# Supplementary material
Source: publisher figshare collection journal article supplement (https://tandf.figshare.com/articles/dataset/_/21220361)
Supplement: Supplementary file 1 [file 1]

**
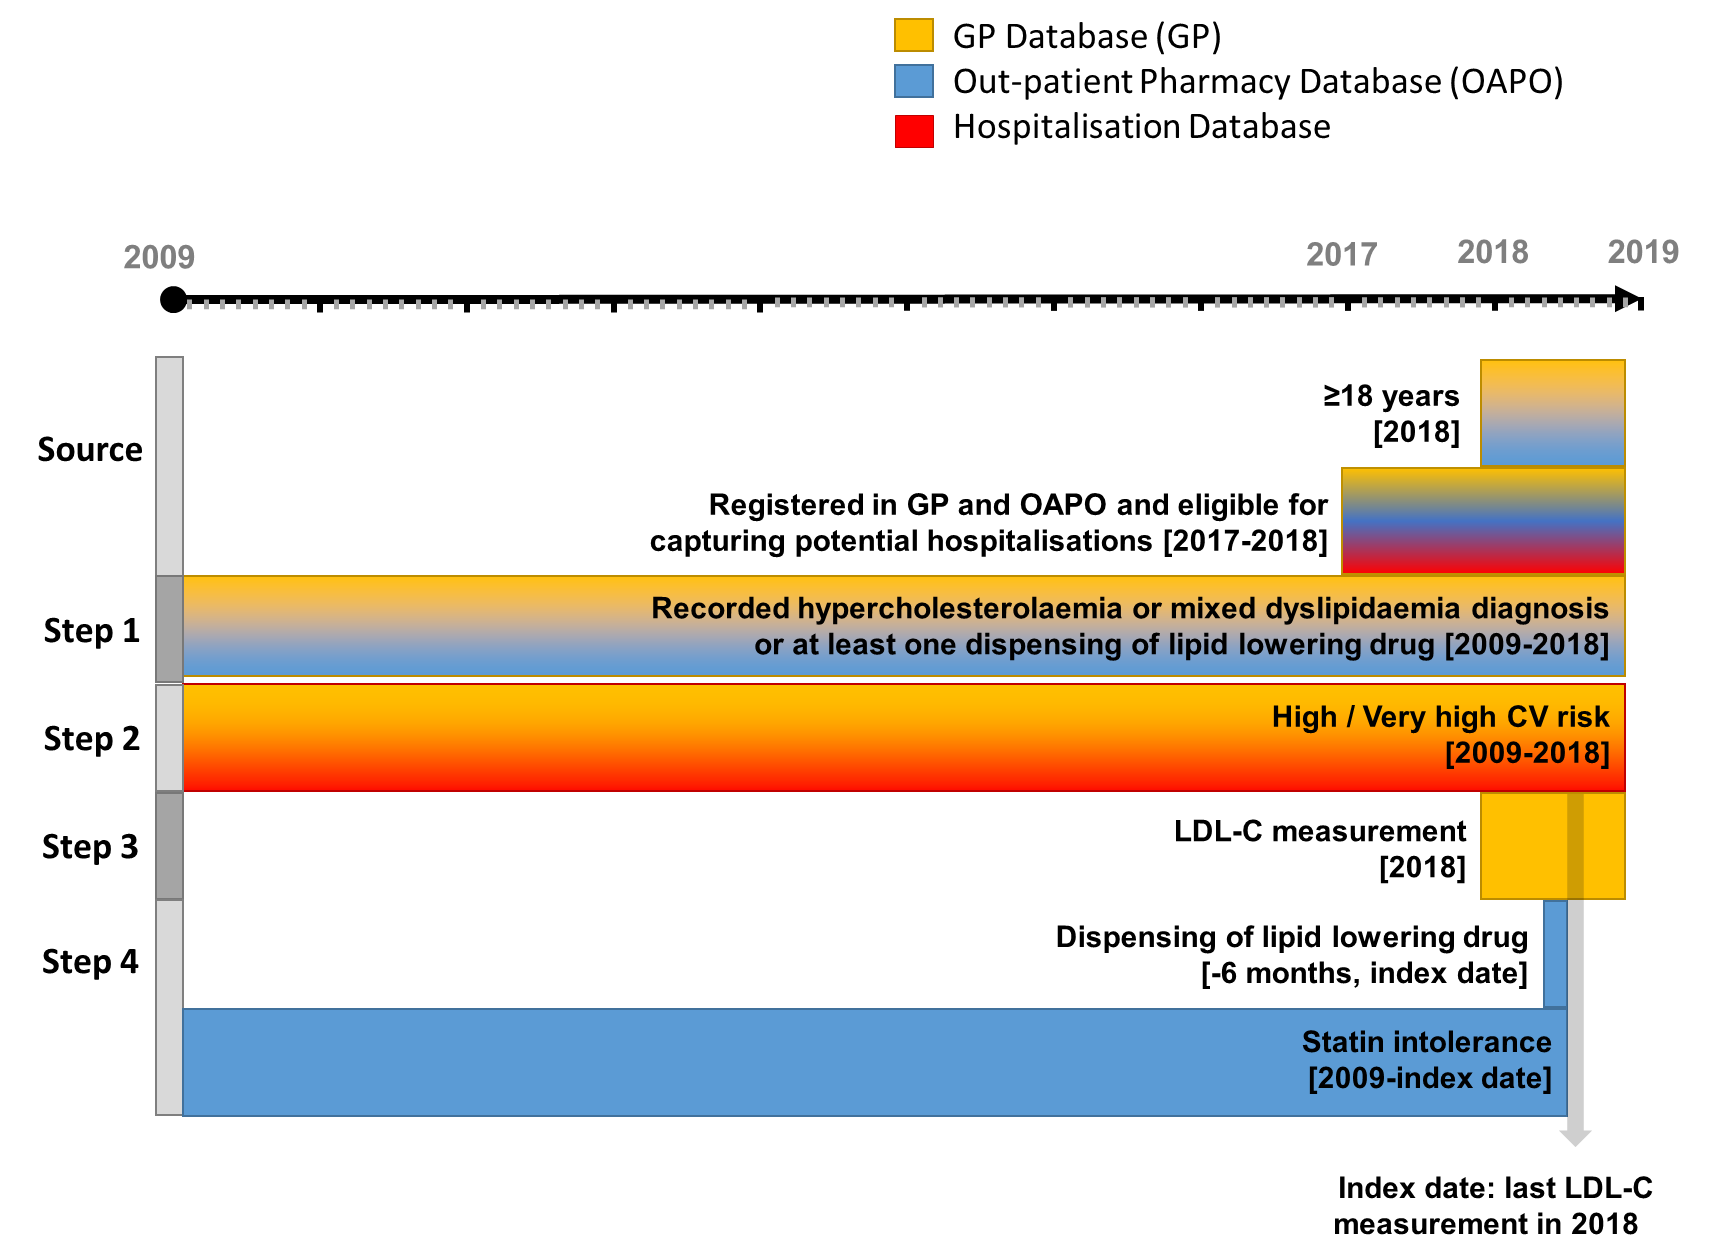
**

**Figure A.1: Study population selection scheme**

The selection of the study population comprised information from multiple linked databases. The coloured bars indicate which databases were used, and from which time window relative to the index date.

CV = cardiovascular; LDL-C = low-density lipoprotein cholesterol
